# Supplementary material
Source: Springer Nature journal article supplement (https://www.springermedizin.de/resource/supplementary/12888_2013_1622_MOESM2_ESM.pdf/9481002)
Supplement: MOESM2 [file 9481002]

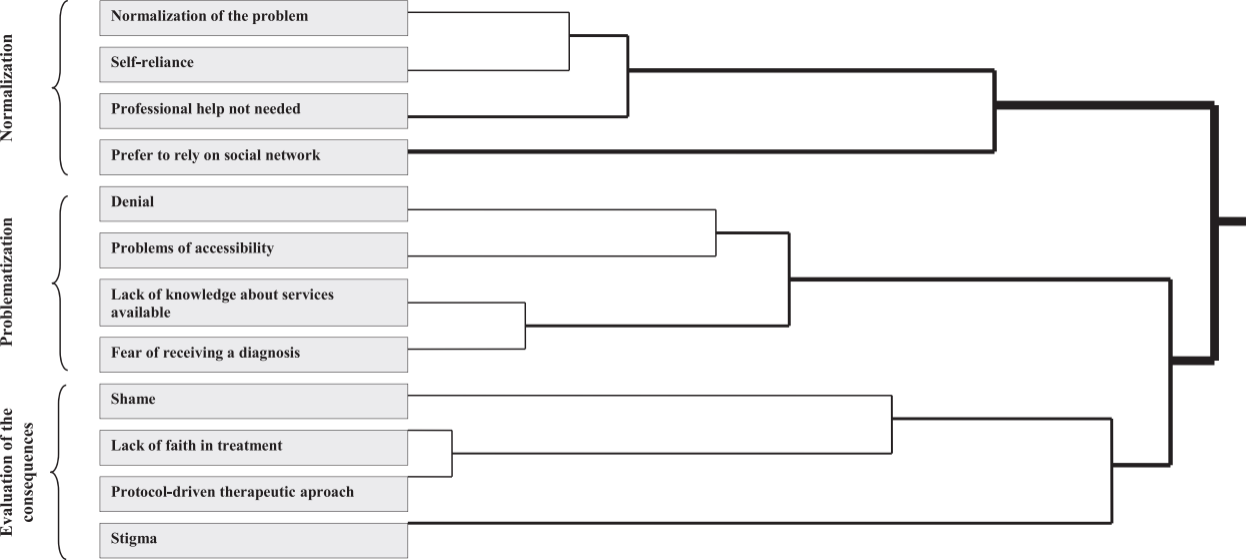

**Normalization of the problem**

**Self-reliance**

**Professional help not needed**

**Prefer to rely on social network**

**Denial**

**Problems of accessibility**

**Lack of knowledge about services available**

**Fear of receiving a diagnosis**

**Shame**

**Lack of faith in treatment**

**Protocol-driven therapeutic approach**

**Stigma**
